# Supplementary material for: Periodic Mesoporous Organosilica Nanoparticles for CO2 Adsorption at Standard Temperature and Pressure
Source: MDPI journal article supplement (doi:10.3390/molecules27134245), 2022-06-30
Supplement: s1 [file s1]

# ESI: Periodic mesoporous organosilica nanoparticles for CO<sub>2</sub> adsorption at standard temperature and pressure

Paul Kirren <sup>1</sup>, Lucile Barka <sup>1</sup>, Saher Rahmani <sup>1</sup>, Nicolas Bondon <sup>1</sup>, Nicolas Donzel <sup>2</sup>, Philippe Trens <sup>2</sup>, Aurélie Bessière <sup>2</sup>, Laurence Raehm <sup>2</sup>, Clarence Charnay <sup>2</sup>, and Jean-Olivier Durand <sup>2</sup>

<sup>1</sup> Capgemini Engineering ; [paul.kirren@altran.com](mailto:paul.kirren@altran.com) (P.K.); [lucile.barka@altran.com](mailto:lucile.barka@altran.com) (L.B.); [saher.rahmani@altran.com](mailto:saher.rahmani@altran.com) (S.R.)

<sup>2</sup> ICGM, Univ Montpellier, CNRS, ENSCM, Montpellier, France; [nicolas.bondon@umontpellier.fr](mailto:nicolas.bondon@umontpellier.fr) (N.B.); [nicolas.donzel@umontpellier.fr](mailto:nicolas.donzel@umontpellier.fr) (N.D.); [Philippe.Trens@enscm.fr](mailto:Philippe.Trens@enscm.fr) (P.T.); [aurelie.bessiere@umontpellier.fr](mailto:aurelie.bessiere@umontpellier.fr) (A.B.); [laurence.raehm@umontpellier.fr](mailto:laurence.raehm@umontpellier.fr) (L.R.); [clarence.charnay@umontpellier.fr](mailto:clarence.charnay@umontpellier.fr) (C.C.); [jean-olivier.durand@umontpellier.fr](mailto:jean-olivier.durand@umontpellier.fr) (J.-O.D.).

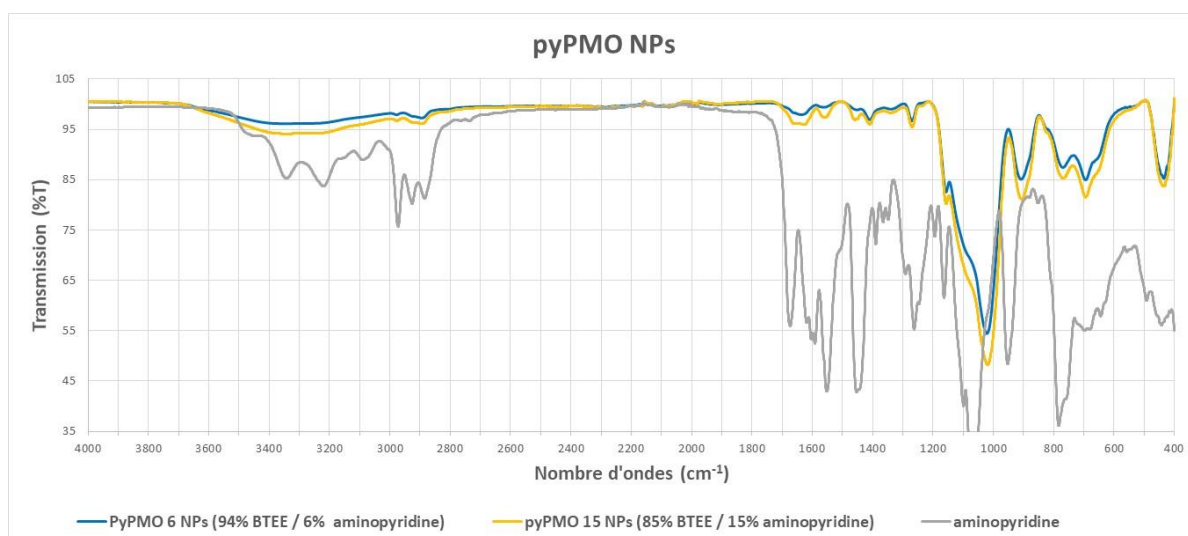

**Figure S1.** FTIR-ATR of pyPMO NPs

**Table S1,** Microanalyses of PMO1NPs and pyPMO NPs

| PMO NPs                                  | % C    | % H   | % N   | % O   | % Si   |
|------------------------------------------|--------|-------|-------|-------|--------|
| PMO 1 NPs (100% ethane)                  | 18.298 | 4.358 | 0.156 | 6.099 | 71.089 |
| pyPMO 6 NPs (94% ethane / 6% pyridine)   | 18.290 | 4.411 | 1.446 | 6.583 | 69.27  |
| pyPMO 15 NPs (85% ethane / 15% pyridine) | 19.386 | 4.279 | 2.880 | 5.987 | 67.468 |

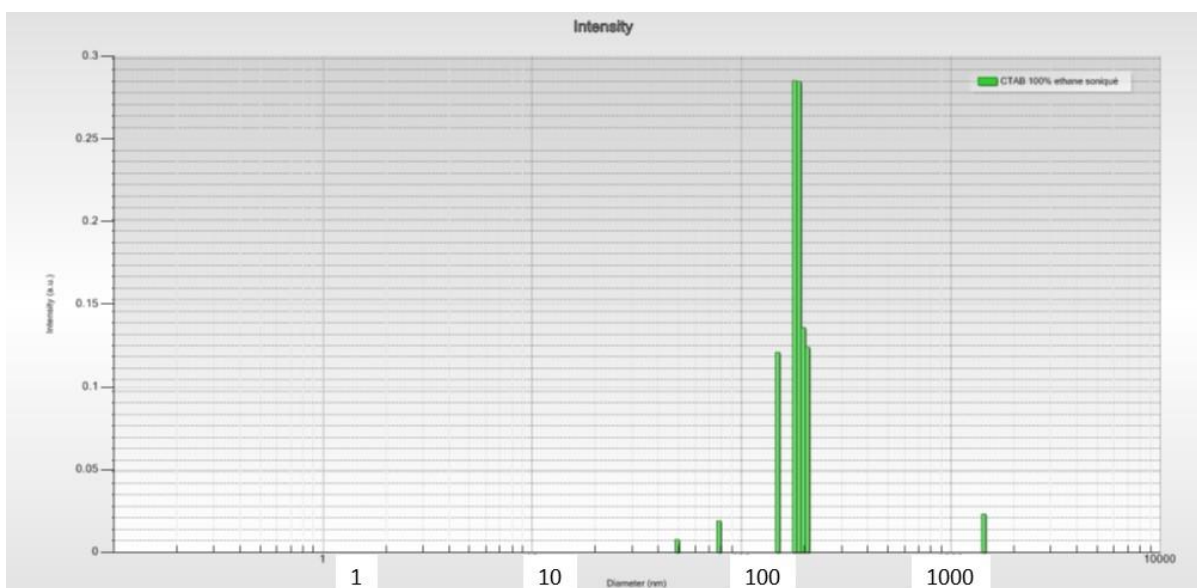

**\*Figure S2.** DLS of PMO 1 NPs in EtOH intensity mode

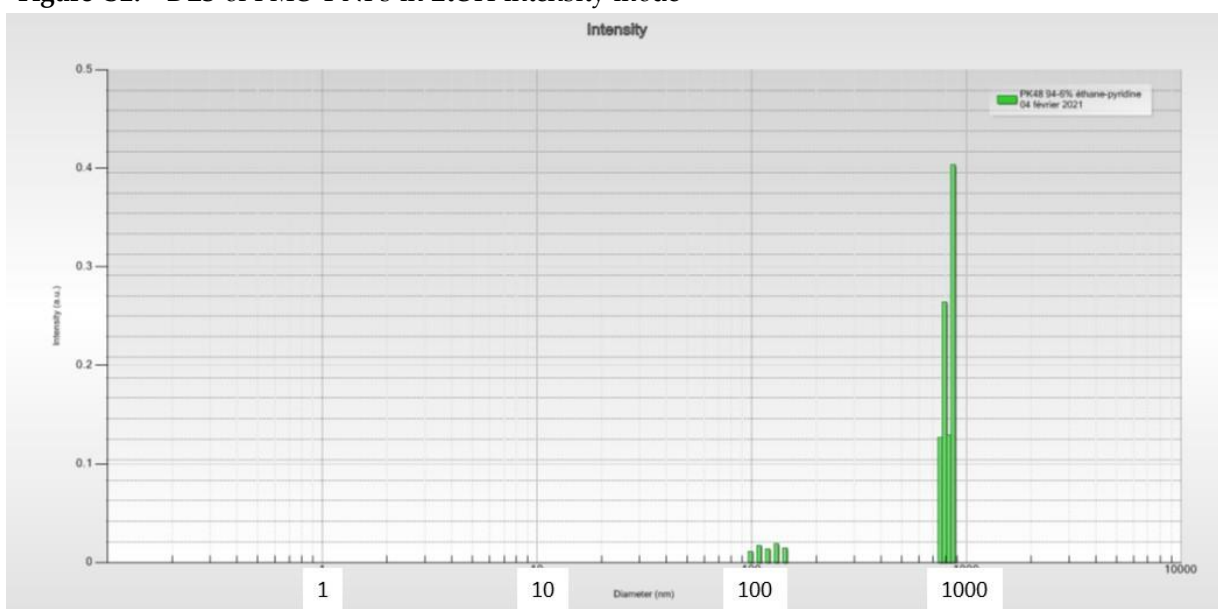

**Figure S3.** DLS of pyPMO 6 NPs in EtOH intensity mode

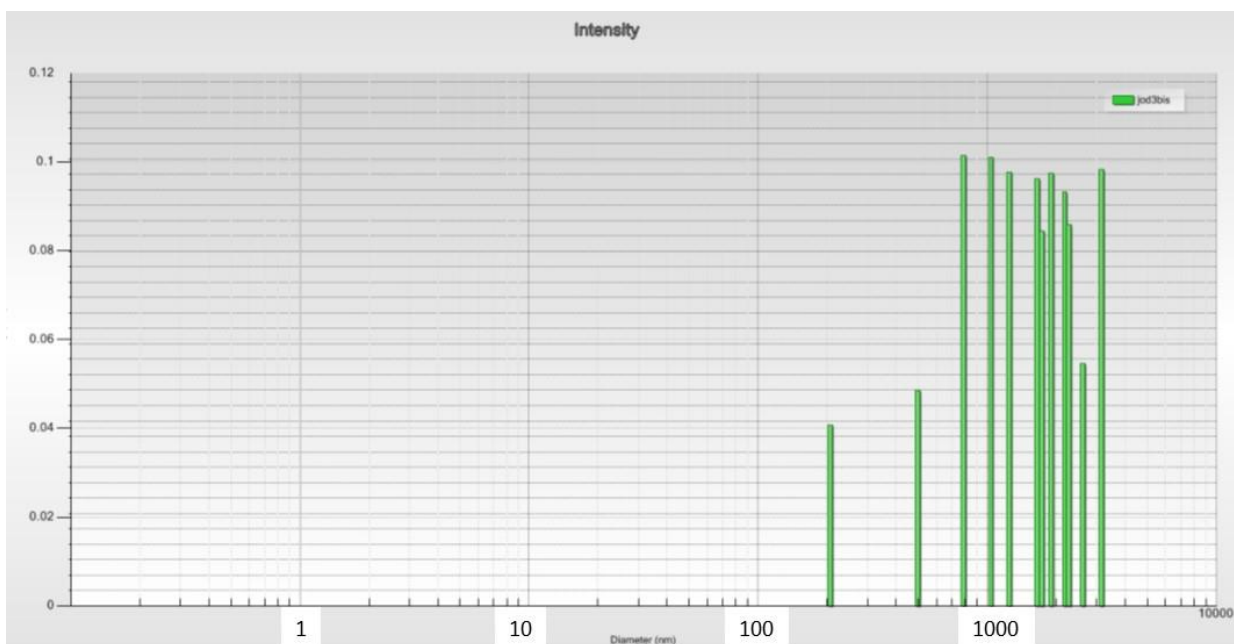

**Figure S4.** DLS of pyPMO 15 NPs in EtOH intensity mode

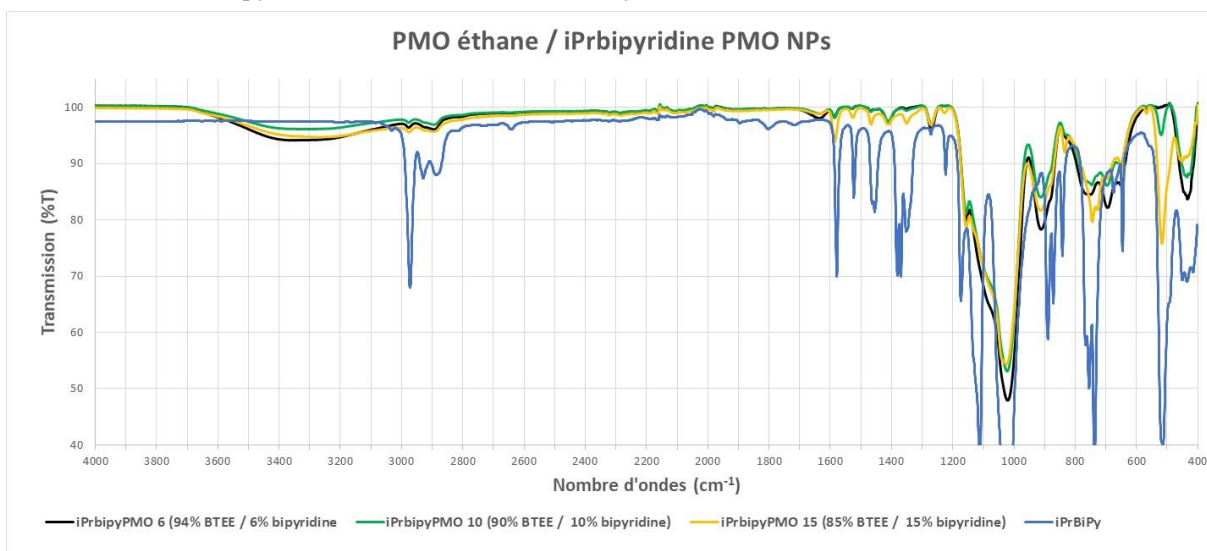

**Figure S5.** FTIR-ATR of iPrbipyPMO NPs

**Table S2,** Microanalyses of PMO1 NPs and iPrbipyPMO NPs

| PMO NPs                                      | % C    | % H   | % N   | % O   | % Si   |
|----------------------------------------------|--------|-------|-------|-------|--------|
| PMO 1 NPs (100% ethane)                      | 18.298 | 4.358 | 0.156 | 6.099 | 71.089 |
| iPrbipyPMO 6 NPs (94/6% ethane/bipyridine)   | 19.374 | 3.934 | 0.976 | 3.143 | 72.573 |
| iPrbipyPMO 10 NPs (90/10% ethane/bipyridine) | 21.546 | 3.854 | 2.214 | 3.428 | 68.958 |

|                                                    |        |       |       |       |        |
|----------------------------------------------------|--------|-------|-------|-------|--------|
| iPrbipyPMO 15 NPs<br>(85/15%<br>ethane/bipyridine) | 28.011 | 3.923 | 4.315 | 4.466 | 59.285 |
|----------------------------------------------------|--------|-------|-------|-------|--------|

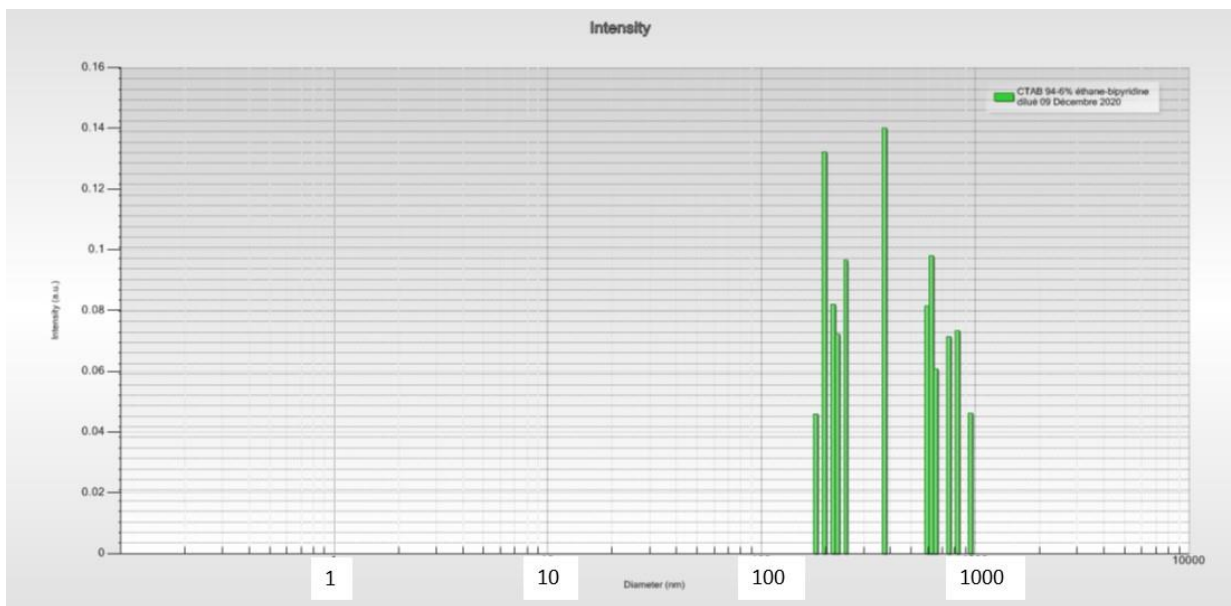

**Figure S6.** DLS of iPrbipyPMO 6 NPs in EtOH intensity mode

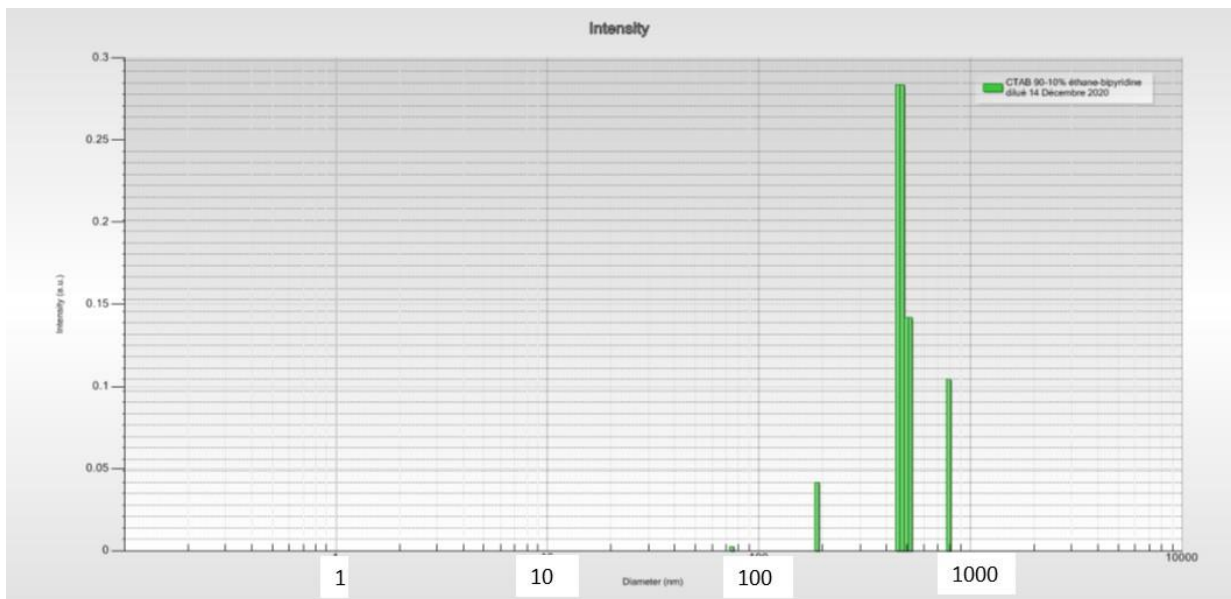

**Figure S7.** DLS of iPrbipyPMO 10 NPs in EtOH intensity mode

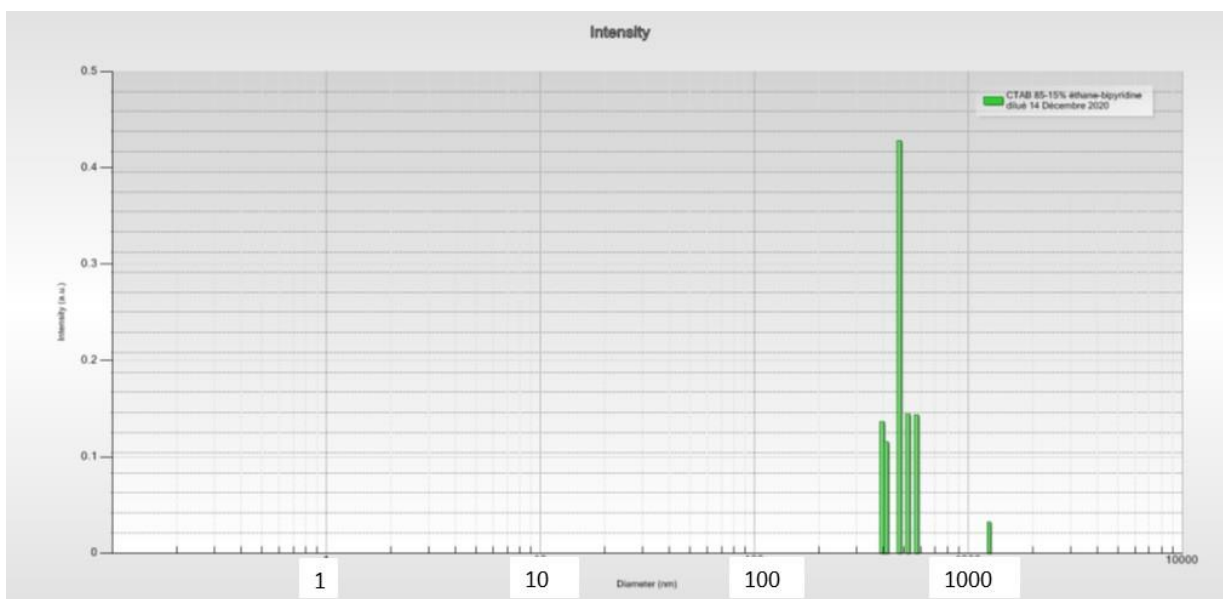

**Figure S8.** DLS of iPrbipyPMO 15 NPs in EtOH intensity mode

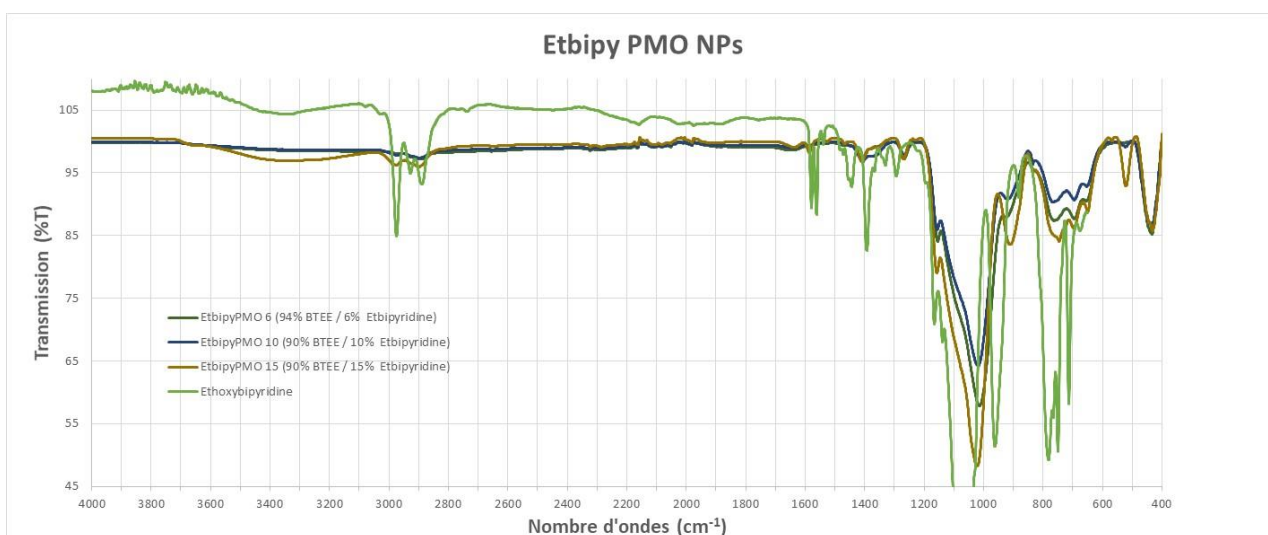

**Figure S9.** FTIR-ATR of EtbipyPMO NPs

**Table S3,** Microanalyses of PMO1 NPs and EtbipyPMO NPs

| PMO NPs                                                | % C    | % N   |
|--------------------------------------------------------|--------|-------|
| PMO 1 NPs (100%<br>éthane)                             | 18.298 | 0.156 |
| EtbipyPMO 6 NPs<br>(94% éthane / 6%<br>Etbipyridine)   | 14.710 | 0.461 |
| EtbipyPMO 10 NPs<br>(90% éthane / 10%<br>Etbipyridine) | 16.742 | 0.855 |
| EtbipyPMO 15 NPs<br>(85% éthane / 15%<br>Etbipyridine) | 18.162 | 1.670 |

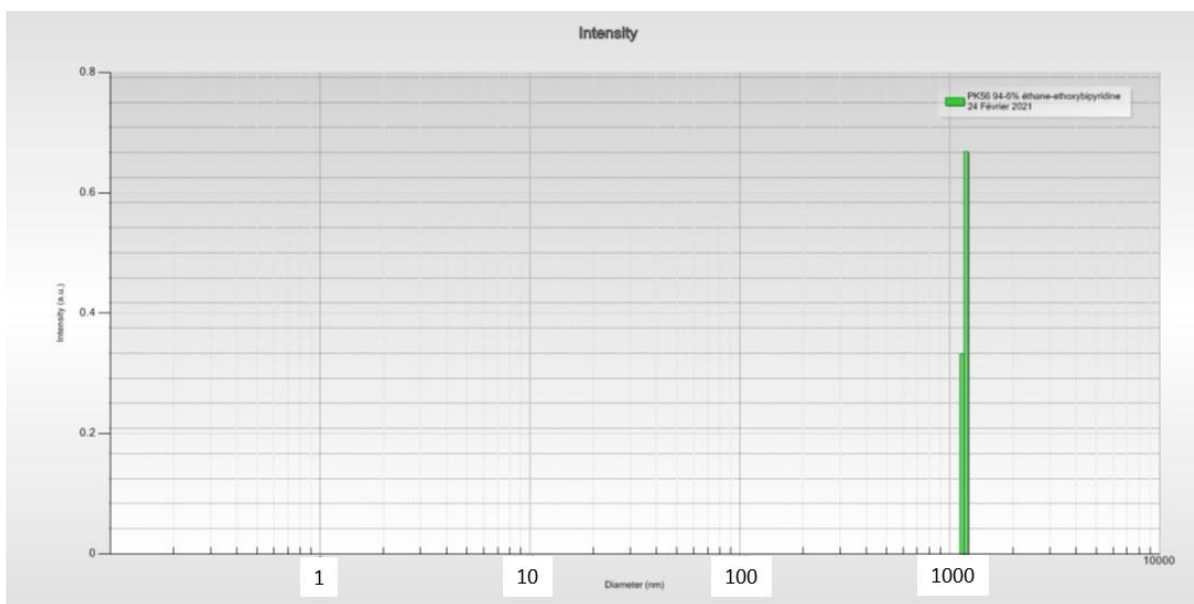

**Figure S10.** DLS of EtPrbipyPMO 6 NPs in EtOH intensity mode

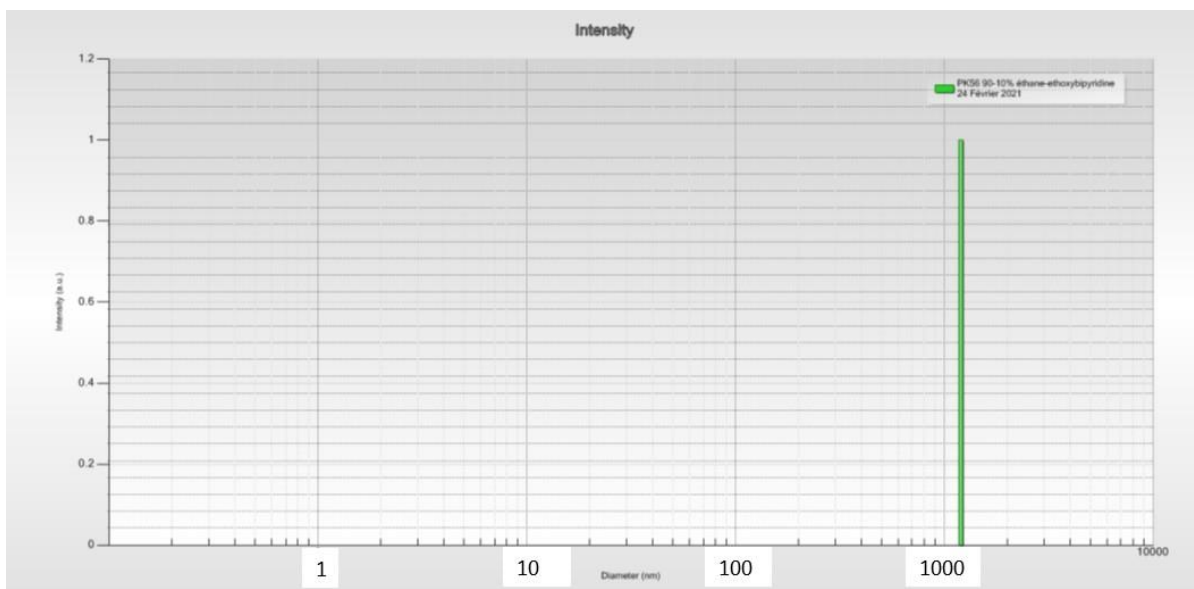

**Figure S11.** DLS of EtbipyPMO 10 NPs in EtOH intensity mode

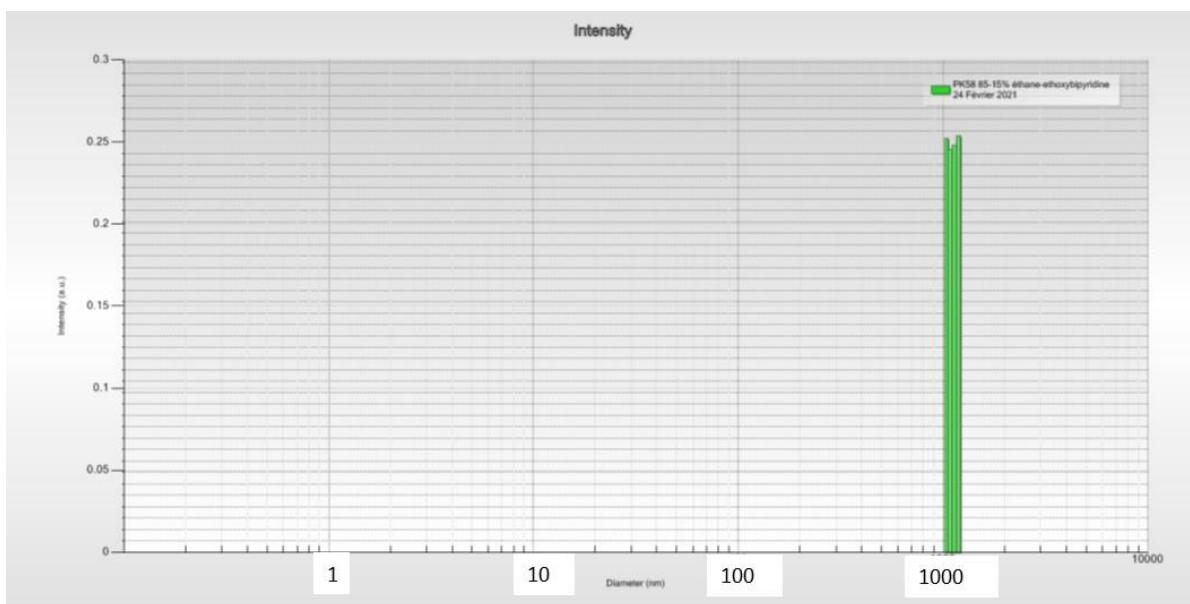

**Figure S12.** DLS of EtbipyPMO 15 NPs in EtOH intensity mode
